# Supplementary material
Source: ML conference proceedings conference paper supplement (https://proceedings.neurips.cc/paper_files/paper/2023/hash/7ca55c8276acf1f0aa996cd3622d1df4-Abstract.html)
Supplement: Supplementary file 1 [file 7ca55c8276acf1f0aa996cd3622d1df4-Supplemental-Conference.pdf]

415 **A Introduction of do calculus.**

416 Do-calculus consists of three rules that help with identifying causal effects.

**Rule A.1** (Insertion/deletion of observations).

$$P(y|do(x), z, w) = P(y|do(x), w) \quad \text{if } (Y \perp\!\!\!\perp Z|X, W)_{G_{\overline{X}}} \quad (13)$$

**Rule A.2** (Action/observation exchange).

$$P(y|do(x), do(z), w) = P(y|do(x), z, w) \quad \text{if } (Y \perp\!\!\!\perp Z|X, W)_{G_{\overline{XZ}}} \quad (14)$$

**Rule A.3** (Insertion/deletion of actions).

$$P(y|do(x), do(z), w) = P(y|do(x), w) \quad \text{if } (Y \perp\!\!\!\perp Z|X, W)_{G_{\overline{XZ}(W)}} \quad (15)$$

417 where  $G_{\overline{X}}$  is the graph with all incoming edges to  $X$  being removed,  $G_{\overline{W}}$  is the graph with all  
 418 outgoing edges to  $W$  being removed, and  $Z(W)$  is the set of  $Z$ -nodes that are not ancestors of any  
 419  $W$ -node.

420 Intuitively, Rule A.1 states when an observant can be omitted in estimating the interventional  
 421 distribution, Rule A.2 illustrates under what condition, the interventional distribution can be estimated  
 422 using the observational dataset, and Rule A.3 decides when we can ignore an intervention.

423 **B Proofs**

424 **B.1 Proof of Proposition 2.1**

425 **Proposition B.1.** *Let  $Z_1$  and  $Z_2$  be two random variables,  $\mathbf{C}^*$  be the ground truth confounder set. If*  
 426  *$\mathbf{C}$  is a superset of or is equivalent to  $\mathbf{C}^*$ , i.e.,  $\mathbf{C}^* \subseteq \mathbf{C}$ , with  $c$  being a realization of  $\mathbf{C}$ , we have*

$$P(Z_2|do(Z_1)) = \sum_{c \in \mathbf{C}} P(Z_2|Z_1, \mathbf{C} = c)P(\mathbf{C} = c) \quad (16)$$

427 if no  $C \in \mathbf{C}$  is a descendent of  $\mathbf{Z}$ .

*Proof.*

$$\begin{aligned} P(Z_2|do(Z_1)) &= P(Z_2|do(Z_1), \mathbf{C})P(\mathbf{C}|do(Z_1)) \\ P(Z_2|do(Z_1), \mathbf{C}) &\stackrel{\text{Rule A.2}}{=} P(Z_2|Z_1, \mathbf{C}) \\ P(\mathbf{C}|do(Z_1)) &\stackrel{\text{Rule A.3}}{=} P(\mathbf{C}) \\ P(Z_2|do(Z_1)) &= \sum_{c \in \mathbf{C}} P(Z_2|Z_1, \mathbf{C} = c)P(\mathbf{C} = c) \end{aligned}$$

428

□

429 **B.2 Proof of Theorem 4.1**

430 **Theorem B.2.** *Suppose that the latent variable  $\mathbf{Z}$  on dataset  $\mathbf{X}$  given  $\mathbf{C} = c$  is Gaussian*  
 431  *$\mathcal{N}(\mu^c(\mathbf{X}), \Sigma^c(\mathbf{X}))$ . Specifically,*

$$P(\mathbf{Z}|\mathbf{C} = c, \mathbf{X}) = (2\pi)^{-D/2} \det(\Sigma^c)^{-1/2} \exp\left(-\frac{1}{2}(\mathbf{Z} - \mu^c)^\top (\Sigma^c)^{-1} (\mathbf{Z} - \mu^c)\right),$$

432 where  $\mathbf{Z} \in \mathbb{R}^D$ . If  $\Sigma^c(\mathbf{X})$  is diagonal for all  $c$ , we have

$$l_c = \sum_{i=1}^D [\mathbb{E}(Z_i|do^c(Z_{-i}), \mathbf{X}) - \mathbb{E}(Z_i|\mathbf{X})] = 0. \quad (17)$$

433 *Proof.* We suppose that

$$P(\mathbf{Z}|\mathbf{C} = c, \mathbf{X}) = (2\pi)^{-D/2} \det(\Sigma^c)^{-1/2} \exp\left(-\frac{1}{2}(\mathbf{Z} - \mu^c)^\top (\Sigma^c)^{-1} (\mathbf{Z} - \mu^c)\right) \quad (18)$$

434 where we omit  $\mathbf{X}$  for simplicity and  $D$  is the dimension of  $\mathbf{Z}$  for any given  $c$ . By definition of  $l_c$   
 435 (Equation (9)) and proposition 2.1,

$$l_c = \sum_{i=1}^D d(\mathbb{E}[Z_i|do^c(Z_{-i}), \mathbf{X}] - \mathbb{E}[Z_i|\mathbf{X}]) \quad (19)$$

$$= \sum_i^D d(E[Z_i|Z_{-i}, \mathbf{X}, C = c], E[Z_i|\mathbf{X}, C = c]) \quad (20)$$

$$= \sum_i^D d(E[Z_i^c|Z_{-i}^c], E[Z_i^c]) \quad (21)$$

436 where we denote  $\mathbf{Z}^c = [\mathbf{Z}|\mathbf{X}, C = c]$  for simplicity. Notice that  $\mathbf{Z}^c \sim \mathcal{N}(\mu^c, \Sigma^c) \in \mathbb{R}^D$ , we  
 437 therefore know that the conditional distribution of any subset vector  $Z_k^c$ , given the complement vector  
 438  $Z_j^c$ , is also a multivariate Gaussian distribution [22]

$$Z_k^c|Z_j^c \sim \mathcal{N}(\mu_{k|j}^c, \Sigma_{k|j}^c) \quad (22)$$

439 where

$$\mu_{k|j}^c = \mu_k^c + \Sigma_{k,j}^c (\Sigma_{j,j}^c)^{-1} (Z_j^c - \mu_j^c), \quad \Sigma_{k|j}^c = \Sigma_{k,k}^c - \Sigma_{k,j}^c (\Sigma_{j,j}^c)^{-1} \Sigma_{j,k}^c, \quad (23)$$

440 given that  $\Sigma_{j,j}^c$  is nonsingular.

441 Hence we know that the first expectation in Equation (21) becomes

$$E[Z_i^c|Z_{-i}^c] = \mu_i^c + \Sigma_{i,-i}^c (\Sigma_{-i,-i}^c)^{-1} (Z_{-i}^c - \mu_{-i}^c) \quad (24)$$

442 assuming that  $\Sigma_{-i,-i}^c$  is nonsingular. Since  $\mathbb{E}[Z_i^c] = \mu_i^c$ , the loss  $l_c$  can be written as

$$l_c = \sum_i^D d(\mu_i^c + \Sigma_{i,-i}^c (\Sigma_{-i,-i}^c)^{-1} (Z_{-i}^c - \mu_{-i}^c), \mu_i^c). \quad (25)$$

443 We assume further that  $\Sigma^c$  is a diagonal matrix. Therefore  $\Sigma_{-i,-i}^c = \mathbf{0}$  is a zero row vector. Then

$$l_c = \sum_i^D d(\mu_i^c, \mu_i^c) = 0 \quad (26)$$

444

□

## 445 C Related Work

446 **Disentangled Representations** The pursuit for disentangled representation can be dated to the surge  
 447 of representation learning and is always closely associated with the generative process in modern  
 448 machine learning, following the intuition that each dimension should encode different features.  
 449 [6] attempts to control the underlying factors by maximizing the mutual information between the  
 450 images and the latent representations. [8] propose a quantitative metric with the information theory.  
 451 They evaluate the disentanglement, completeness, and informativeness by fitting linear models and  
 452 measuring the deviation from the ideal mapping. [9, 11, 5, 18] encourage statistical independence by  
 453 penalizing the Kullback-Leibler divergence (KL) term in the VAE objective. However, the non-causal  
 454 definitions of disentanglement fail to consider the cases where correlated features in the observational  
 455 dataset can be disentangled in the generative process. Such a challenge is well-approached through a  
 456 line of research from the causal perspective.

457 **Causal Generative Process.** Causal methods are widely used for eliminating spurious features  
 458 in various domains and improving understandable modelling behaviours[25, 26, 14]. It is not  
 459 until [23] that it was introduced for a strict characterization of the generative process. [23] first

460 provided a rigorous definition of a causal generative process and the definition of disentangled  
 461 causal representation as the non-existence of causal relationships between two variables, i.e., the  
 462 intervention on one variable does not alter the distribution of the others. The authors further introduce  
 463 *interventional robustness* as an evaluation metric and show its advantage on multiple benchmarks.  
 464 [21] follow the path of [23] and further propose two evaluation metrics and the Candle dataset.  
 465 The confounded assumption allows for correlation in the latent space without tempering with the  
 466 disentanglement in the data generative. Despite effective evaluation tools, there is still a missing  
 467 piece on how to infer a set of causally disentangled features. Using the proposed evaluation metric  
 468 as regulation, the model implicitly assumes unconfoundedness and it falls back to finding statistical  
 469 independence in the latent space. The problem of unrealistic unconfoundedness assumption is  
 470 identified by [24]. They assume that confounders exist but they are unobservable. They further  
 471 propose an evaluation metric considering the existence of confounders, that causally disentangled  
 472 latent variables have independent support measured by the IOSS score. Similar to the evaluation  
 473 metrics introduced in [23, 21], IOSS is also a necessary condition of the causal disentanglement. More  
 474 importantly, as in previous work focusing on obtaining statistical independence, such a regulation  
 475 suffers from the identifiability issue.

476 **Weak Supervision for Inductive Bias.** The identifiability issue in unsupervised disentangled  
 477 representation learning is first identified in [16]. Specifically, they show from the theory that such a  
 478 learning task is impossible without inductive biases on both the models and the data. Naturally, a  
 479 series of weak-supervised or semi-supervised methods [4, 1, 2] are proposed with a learning objective  
 480 of statistical independence or alignment. In this paper, we take a step further for the confounding  
 481 assumption, assuming that the confounders are observable with proper inductive bias so that the  
 482 latent representation can be better identified. We, similarly, adopt partial labels of the dataset as the  
 483 supervision signal. We treat the labels as a source of possible confounders and allow the learning of  
 484 correlated but causally disentangled latent generative factors to be learned.

## 485 D Experimental Details

### 486 D.1 Experimental Details

487 The experiments are conducted on 4 NVIDIA GeForce RTX 2080Ti. In each experiment, we repeat 5  
 488 times with different seeds and report the averaged results. In all experiments, only partial information  
 489 on the ground truth confounder is provided. Specifically, for example, the 3dshape dataset, we first  
 490 make some predefined rules, such as “70% cubes are red”. Then we generate 700 red cubes and 300  
 491 cubes in other colors. The generation process naturally divides the dataset into different subgroups,  
 492 and we can thus explicitly control how inductive bias is provided, i.e., the grouping. In the celebA  
 493 dataset, since we do not have access to the ground truth generative factors, so we assume any label  
 494 sets only contain partial information.

### 495 D.2 Ablation study

496 We investigate how the choice of  $\mathbf{C}$  affect the model performance and how to adapt C-Disentanglement  
 497 to the existing method aiming for statistical independence, as shown in appendix D.

Table 3: Performance under different  $\mathbf{C}$  on shape classification on 3dshape dataset, shift severity=0.5.

| Choice of $\mathbf{C}$      | Acc - T $\uparrow$ | IRS $\uparrow$ |
|-----------------------------|--------------------|----------------|
| $\mathbf{C} = \emptyset$    | 79.2               | 0.82           |
| $\mathbf{C} = \mathbf{C}^*$ | 88.2               | 0.89           |
| partial $\mathbf{C}^*$      | 84.5               | 0.87           |

499 **C-Disentanglement improves the learning of ground truth generative factors under a reasonable  
 500 choice of label set.** To understand how the choice of  $\mathbf{C}$  affects the performance, we repeat the shape  
 501 classification task with different choices of  $\mathbf{C}$  under 50% shift severity. When with  $\mathbf{C}$ , we assume  
 502 the generative process is unconfounded, and cdVAE degrades to the vanilla VAE model. With  
 503 partial  $\mathbf{C}$ , we partition the data according to only 2 values of the shifting variables instead of 4.

Table 4: Adapt cdVAE to existing methods. The IOSS and Reconstruction loss are measured based on image generation task and the performance drop is measured on shape classification on the target domain under shift severity=0.5.

| Methods      | IOSS $\downarrow$ | Recon $\downarrow$ | Acc-T $\uparrow$ |
|--------------|-------------------|--------------------|------------------|
| IOSS         | 0.14              | 0.12               | 81.8             |
| cdVAE + IOSS | 0.12              | 0.08               | 84.5             |

504 With full  $\mathbf{C}$ , we provide the full confounders. As shown in Table 3, even partial information of the  
 505 confounders improves the model performance in OOD generalization and obtains more robust latent  
 506 representations.

507 **Adapting C-Disentanglement to existing works further improve their performance.** We compare  
 508 the performance between regulation through IOSS[24] and cdVAE + IOSS in image generation and  
 509 classification tasks on 3dshape dataset. In the cdVAE + IOSS, we apply additional regularization  
 510 terms based on the  $\mathbf{Z}$ . The results show that C-Disentanglement framework could further improve the  
 511 performance with desired level of inductive bias given.

### 512 D.3 Pseudo-code

---

**Algorithm 1** Train a VAE such that the latent representation is causally disentangled

---

**Input:** Number of labels  $N_C$ , training data  $\mathbf{X}$  with labels  $c$ , ratio of each categories/confounders  
 $P(\mathbf{C} = c)$  in the training set, dimension of latent space  $D$

- 1: **for**  $x \in \mathbf{X}$  **do**
- 2:   **for**  $c \in \mathbf{C}$  **do**
- 3:     Define  $\mathbf{Z}^c = [\mathbf{Z}|x, C = c]$ , and obtain from encoder  $\mathbf{Z}^c \sim \mathcal{N}(\mu^c(x), \Sigma^c(x))$  for each  $c$ ,  
 assuming  $\Sigma^c(x)$  to be diagonal matrix:

$$\Theta_{enc}^c(x) = [\mu^c, \text{diag}(\Sigma^c)] \in \mathbb{R}^{2d}, \quad \mu^c \in \mathbb{R}^d, \quad \text{diag}(\Sigma^c) \in \mathbb{R}^d \quad (27)$$

- 4:     Sample from  $\mathbf{Z}^c \sim \mathcal{N}(\mu^c(x), \Sigma^c(x))$ :

$$\mathbf{Z}^c = \mu^c + (\Sigma^c)^{\frac{1}{2}} \epsilon^c, \epsilon^c \sim \mathcal{N}(\mathbf{0}, I) \quad (28)$$

- 5:     Parametrize  $\pi^c \sim \mathcal{N}(\mu_{\pi^c}(x), \sigma_{\pi^c}(x)) \in \mathbb{R}$  with neural network.
- 6:     Regulate the covariance matrix to be identity matrix with KL divergence

$$D_{KL}^c = \frac{1}{2} \left[ \log \frac{1}{\det \Sigma^c} - D + \text{tr}(\Sigma^c) \right] \quad (29)$$

- 7:   **end for**
- 8:   Normalize  $\Pi_C = (\pi^{c_1}, \dots, \pi^{c_{N_C}})$  such that  $\|\Pi_C\|^2 = 1$ .
- 9:   Compute classification loss between  $\Pi_C$  with label  $c$ :

$$\mathcal{L}_{cls} = H(\Pi_C, c) \quad (30)$$

- 10:   Let  $\mathbf{Z}(x) = \sum_{c \in \mathbf{C}} \pi^c \mathbf{Z}^c(x)$ , and obtain the reconstructed sample from decoder:  $x' = \Theta_{dec}(\mathbf{Z}(x))$ . Compute reconstruction loss for  $\mathbf{Z}(x)$ :

$$\mathcal{L}_{rec} = \text{mse}(x', x) \quad (31)$$

- 11:   Compute total loss

$$\mathcal{L}_{total}(x) = \mathcal{L}_{rec} + \mathcal{L}_{cls} + \sum_{c \in \mathbf{C}} D_{KL}^c \quad (32)$$

and update encoders and decoders.

- 12: **end for**
- 

### 513 D.4 Additional Experimental Results

514 The classification accuracy on both the source and the target distribution with variance is given in the  
 515 table below.

Table 5: Compare cdVAE with  $\beta$ -Vae, CAUSAL-REP on classification under distribution shift. **T** represents accuracy on the target data, **S** represents the performance on the target domain when the classifier trained on the source data is directly tested on the target data.

| Methods      | shift = 0.4 |           | shift = 0.5 |           | severity = 0.6 |           |
|--------------|-------------|-----------|-------------|-----------|----------------|-----------|
|              | Acc-S       | Acc-T     | Acc-S       | Acc-T     | Acc-S          | Acc-T     |
| CAUSAL-REP   | 94.1±0.04   | 82.1±0.08 | 94.3±0.03   | 81.9±0.07 | 94.3±0.02      | 81.8±0.11 |
| $\beta$ -VAE | 93.4±0.07   | 80.7±0.12 | 93.6±0.05   | 80.7±0.03 | 93.4±0.04      | 80.3±0.09 |
| cdVAE        | 94.6±0.02   | 84.5±0.05 | 94.6±0.04   | 84.4±0.05 | 94.5±0.03      | 84.4±0.04 |
